# Supplementary material
Source: PubMed Central journal article supplement (PMC9574826)
Supplement: 41579_2022_807_MOESM1_ESM.pdf [file 41579_2022_807_MOESM1_ESM.pdf]

**Supplementary information**

---

**The effects of the COVID-19 pandemic on  
community respiratory virus activity**

---

In the format provided by the  
authors and unedited

## Supplementary information

### The effects of the COVID-19 pandemic on community respiratory virus activity

Eric J. Chow<sup>1</sup>, Timothy M. Uyeki<sup>2</sup> and Helen Y. Chu<sup>1\*</sup>

<sup>1</sup>Division of Allergy and Infectious Diseases, University of Washington, Seattle, WA, USA

<sup>2</sup>Influenza Division, Centers for Disease Control and Prevention, Atlanta, Georgia, USA

#### Contents

|                                                                                                      |   |
|------------------------------------------------------------------------------------------------------|---|
| Supplementary Table 1. Community Endemic viruses Associated with Respiratory Infections in Humans... | 2 |
| Supplementary References.....                                                                        | 8 |

**Supplementary Table 1 Community Endemic Viruses Associated with Respiratory Infections in Humans**

| Name                                            | Taxonomy                                                                                                                                                                        | Virology                                                    | Clinical Features                                                                                                                                                                                                                                                                                                                            | Seasonality                                                                                                                                                   | Methods of Transmission                                                                                                                                                                                                                                                                                     | Community Activity Changes During the COVID-19 Pandemic                                                                                                                                                                                                                                   |
|-------------------------------------------------|---------------------------------------------------------------------------------------------------------------------------------------------------------------------------------|-------------------------------------------------------------|----------------------------------------------------------------------------------------------------------------------------------------------------------------------------------------------------------------------------------------------------------------------------------------------------------------------------------------------|---------------------------------------------------------------------------------------------------------------------------------------------------------------|-------------------------------------------------------------------------------------------------------------------------------------------------------------------------------------------------------------------------------------------------------------------------------------------------------------|-------------------------------------------------------------------------------------------------------------------------------------------------------------------------------------------------------------------------------------------------------------------------------------------|
| Adenovirus <sup>1</sup>                         | <p><b>Family:</b> <i>Adenoviridae</i><br/> <b>Genus:</b> <i>Mastadenovirus</i><br/> <b>Species:</b> <i>Human mastadenovirus A-G</i><br/> <b>Serotype:</b> &gt; 80 serotypes</p> | <p>Double-stranded, non-enveloped DNA virus</p>             | <p>Range of clinical disease phenotypes including upper and lower respiratory tract and gastrointestinal disease that may differ by serotype; systemic disease in those who are immunocompromised; exacerbation of underlying conditions; can cause latent infections and reactivate when the immune system is compromised<sup>2-8</sup></p> | <p>Year-round circulation with peaks in the winter and early spring in temperate climates; possible species and serotype-specific seasonality<sup>2</sup></p> | <p>Transmission likely influenced by clinical disease phenotype including respiratory droplets, mucosal and conjunctival inoculation, fecal-oral spread, fomite transfer and exposure to bodily fluids; can have long shedding period</p>                                                                   | <ul style="list-style-type: none"> <li>• Adenoviruses experienced a decrease in community activity at the beginning of the COVID-19 pandemic, but detections increased and persisted despite ongoing use of non-pharmaceutical interventions in some locations.<sup>9-12</sup></li> </ul> |
| Human bocavirus <sup>13,14</sup>                | <p><b>Family:</b> <i>Parvoviridae</i><br/> <b>Genus:</b> <i>Bocaparovirus</i><br/> <b>Species:</b> Human bocavirus 1-4</p>                                                      | <p>Single-stranded, non-enveloped DNA virus</p>             | <p>Respiratory tract disease frequently accompanied by other viral co-infections; may also be associated with gastrointestinal disease in some people; exacerbation of underlying conditions<sup>13,15,16</sup></p>                                                                                                                          | <p>Not well described, but in temperate climates appears to circulate year-round with highest prevalence in the autumn to spring<sup>13,17</sup></p>          | <p>Thought to be primarily transmitted via respiratory droplets, may also be transmitted via fecal-oral transmission; found in respiratory secretions, blood and feces; theoretical fomite transmission given its resistance to environmental factors on frequently touched surfaces<sup>15,18-20</sup></p> | <ul style="list-style-type: none"> <li>• Across most locations, human bocavirus activity decreased at the onset of the COVID-19 pandemic with reports of infection resurgences later in 2020.<sup>12,21-24</sup></li> </ul>                                                               |
| Human coronavirus, seasonal <sup>20,25,26</sup> | <p><b>Family:</b> <i>Coronaviridae</i><br/> <b>Genus:</b> <i>Alphacoronavirus</i><br/> <b>Species:</b> HCoV-229E, HCoV-NL63</p>                                                 | <p>Single-stranded, positive-sense, enveloped RNA virus</p> | <p>Upper and lower respiratory tract disease; exacerbation of underlying conditions; likely species-specific clinical disease phenotypes<sup>27-29</sup></p>                                                                                                                                                                                 | <p>Contributes to annual winter peaks with alternating predominance of species; HCoV-OC43 typically shows an annual peak in winter</p>                        | <p>Transmitted primarily through respiratory droplets and aerosols and less commonly through direct contact or self-inoculation through</p>                                                                                                                                                                 | <ul style="list-style-type: none"> <li>• All four seasonal human coronaviruses experienced marked reductions early in the COVID-19 pandemic and remained suppressed through the end of 2020 in the US.<sup>36,37</sup></li> </ul>                                                         |

|                                        |                                                                                                                                                                                                         |                                                                       |                                                                                                                                                                                                                                                                                                                               |                                                                                                                                                                                                                                                                                                                                                                   |                                                                                                                                                                                                                                         |                                                                                                                                                                                                                                                                                                                                                                                                                                                                                                                                                                                                                                                                                                                                                                                                              |
|----------------------------------------|---------------------------------------------------------------------------------------------------------------------------------------------------------------------------------------------------------|-----------------------------------------------------------------------|-------------------------------------------------------------------------------------------------------------------------------------------------------------------------------------------------------------------------------------------------------------------------------------------------------------------------------|-------------------------------------------------------------------------------------------------------------------------------------------------------------------------------------------------------------------------------------------------------------------------------------------------------------------------------------------------------------------|-----------------------------------------------------------------------------------------------------------------------------------------------------------------------------------------------------------------------------------------|--------------------------------------------------------------------------------------------------------------------------------------------------------------------------------------------------------------------------------------------------------------------------------------------------------------------------------------------------------------------------------------------------------------------------------------------------------------------------------------------------------------------------------------------------------------------------------------------------------------------------------------------------------------------------------------------------------------------------------------------------------------------------------------------------------------|
|                                        | <p><b>Family:</b> <i>Coronaviridae</i><br/> <b>Genus:</b> <i>Betacoronavirus</i><br/> <b>Species:</b> HCoV-HKU1,<sup>38</sup><br/> HCoV-OC43</p>                                                        |                                                                       |                                                                                                                                                                                                                                                                                                                               | <p>months; Tropical climates and in temperate sites in China, there is less of a defined seasonality with HCoV circulation<sup>27,30,31</sup></p>                                                                                                                                                                                                                 | <p>fomites; has been recovered in feces, although oral-fecal route is not considered to be a significant transmission mode in humans<sup>32-35</sup></p>                                                                                | <p>•In the US, seasonal epidemics of all four seasonal human coronavirus occurred early in 2021. Timing of these peaks varied by geography and species with elevated detection extending into summer in most locations.<sup>37</sup></p>                                                                                                                                                                                                                                                                                                                                                                                                                                                                                                                                                                     |
| <p>Enterovirus<sup>39</sup></p>        | <p><b>Family:</b> <i>Picornaviridae</i><br/> <b>Genus:</b> <i>Enterovirus</i><br/> <b>Species:</b> <i>Enterovirus A-D</i></p>                                                                           | <p>Single-stranded, positive-sense, non-enveloped RNA virus</p>       | <p>Respiratory tract and gastrointestinal disease, systemic infection, acute cardiovascular events and central nervous system infection, dermatologic disease; clinical phenotype frequently associated with specific species and serotypes; exacerbation of underlying conditions<sup>39,40</sup></p>                        | <p>Regional variations by latitudinal gradients; in the US southern states have more year-round circulation while seasonal peaks occur more in northern regions and a national peak typically during summer months; shifting patterns of serotypes with possible unique seasonality (e.g. Enterovirus D68 with biennial regional circulation)<sup>41,42</sup></p> | <p>Transmission can vary by species and serotype affected by the clinical disease phenotype, Transmission via respiratory droplets or the fecal-oral route are most common; possible vertical transmission perinatally<sup>43</sup></p> | <p>•Most molecular tests are not able to distinguish between enteroviruses and rhinoviruses.</p> <p>•Reports across different countries and regions demonstrated decreased rhinoviruses and respiratory enterovirus activity associated with broad non-pharmaceutical intervention implementation early in the COVID-19 pandemic.<sup>44-46</sup></p> <p>•Unlike other respiratory viruses that remained suppressed, respiratory enterovirus and rhinovirus detection increased back to or above baseline seasonal levels in the middle of 2020. Activity levels persisted despite the ongoing use of non-pharmaceutical interventions in most localities and may reflect inherent viral properties that allow infections to quickly return when NPI implementation is loosened.<sup>9,22,24,45,46</sup></p> |
| <p>Influenza virus<sup>47,48</sup></p> | <p><b>Family:</b> <i>Orthomyxoviridae</i><br/> <b>Genus:</b> <i>Alphainfluenzavirus</i><br/> <b>Species:</b> <i>Influenza A Virus</i><br/> <b>Subtype:</b> <i>A(H3N2)</i>,<br/> <i>A(H1N1)pdm09</i></p> | <p>Single-stranded, negative-sense, enveloped segmented RNA virus</p> | <p>Influenza A and B viruses cause upper and lower respiratory tract disease; associated with extrapulmonary manifestations including neurologic complications and acute cardiovascular events; exacerbation of underlying conditions; Influenza C virus infection typically associated with mild upper respiratory tract</p> | <p>Seasonal epidemic peaks in temperate climates with variability of seasonality in tropical locations including year-round circulation; Species, subtype, and virus strain predominance may vary by year<sup>48,52-55</sup></p>                                                                                                                                  | <p>Transmission by respiratory droplets including aerosols from infected individuals at the onset of symptoms; fomite transmission possible as well although not thought to be a large contributor to</p>                               | <p>•Global seasonal influenza activity including healthcare burden associated with influenza virus infection abruptly decreased at the onset of the COVID-19 pandemic coinciding with broad non-pharmaceutical intervention implementation.<sup>11,44,59-64</sup></p> <p>•Influenza activity remained low</p>                                                                                                                                                                                                                                                                                                                                                                                                                                                                                                |

|                                            |                                                                                                                                                                                                                                                              |                                                      |                                                                                                                                                               |                                                                                                                                                                                                |                                                                                                                                                                                                                                                    |                                                                                                                                                                                                                                                                                                                                                                                            |
|--------------------------------------------|--------------------------------------------------------------------------------------------------------------------------------------------------------------------------------------------------------------------------------------------------------------|------------------------------------------------------|---------------------------------------------------------------------------------------------------------------------------------------------------------------|------------------------------------------------------------------------------------------------------------------------------------------------------------------------------------------------|----------------------------------------------------------------------------------------------------------------------------------------------------------------------------------------------------------------------------------------------------|--------------------------------------------------------------------------------------------------------------------------------------------------------------------------------------------------------------------------------------------------------------------------------------------------------------------------------------------------------------------------------------------|
|                                            | <p><b>Family:</b> <i>Orthomyxoviridae</i><br/> <b>Genus:</b> <i>Betainfluenzavirus</i><br/> <b>Species:</b> <i>Influenza B virus</i><br/> <b>Lineage:</b> <i>B/Victoria, B/Yamagata</i></p>                                                                  |                                                      | disease with lower respiratory tract and gastrointestinal disease also reported <sup>49-51</sup>                                                              |                                                                                                                                                                                                | infection; asymptomatic or pauci-symptomatic individuals may play a role in community transmission <sup>56-58</sup>                                                                                                                                | in many localities through 2021 with sporadic outbreaks reported and interseasonal epidemics; relative increase in influenza activity in 2021-2022 influenza seasons in northern temperate zones and countries in the tropics and subtropics. <sup>10,65-68</sup>                                                                                                                          |
|                                            | <p><b>Family:</b> <i>Orthomyxoviridae</i><br/> <b>Genus:</b> <i>Gammmainfluenzavirus</i><br/> <b>Species:</b> <i>Influenza C virus</i><br/> <b>Lineage:</b> <i>C/Taylor, C/Mississippi, C/Aichi, C/Yamagata, C/Kanagawa, C/Sao Paulo</i><sup>51,70</sup></p> |                                                      |                                                                                                                                                               | Poorly understood; peaks during colder months with possible biennial epidemics <sup>51</sup>                                                                                                   |                                                                                                                                                                                                                                                    | <ul style="list-style-type: none"> <li>•Low levels of circulating influenza virus may create challenges for annual vaccine strain selection.</li> <li>•While influenza A(H3N2), A(H1N1)pdm09, B/Victoria viruses have been reported since the start of the COVID-19 pandemic, there have been no confirmed reports of influenza B/Yamagata since March 2020.<sup>69</sup></li> </ul>       |
| Human metapneumovirus <sup>71-73</sup>     | <p><b>Family:</b> <i>Pneumoviridae</i><br/> <b>Genus:</b> <i>Metapneumovirus</i><br/> <b>Species:</b> <i>Human metapneumovirus</i><br/> <b>Lineage:</b> <i>A1, A2a, A2b, B1, B2</i></p>                                                                      | Single-stranded, negative-sense, enveloped RNA virus | Upper and lower respiratory tract disease; exacerbation of underlying conditions; common cause of community-acquired pneumonia in hospitalized young children | Annual co-circulation of HMPV lineages with alternating predominant lineages that show variability in seasonal peaks; Noted biennial peaks every 2 years in winter and spring <sup>74,75</sup> | Transmission via respiratory droplets and close/direct contact with others; infectious viral particles can be found on frequently touched surfaces but to what extent fomite transmission contributes to community burden is unknown <sup>71</sup> | <ul style="list-style-type: none"> <li>•Community circulation as well as healthcare burden associated with human metapneumovirus was reduced with the spread of SARS-CoV-2 and remained low through the end of 2020.<sup>9-11,21,76,77</sup></li> </ul>                                                                                                                                    |
| Human parainfluenza virus <sup>78,79</sup> | <p><b>Family:</b> <i>Paramyxoviridae</i><br/> <b>Genus:</b> <i>Respirovirus</i><br/> <b>Species:</b> <i>Human respirovirus 1 (HPIV-1), Human respirovirus 3 (HPIV-3)</i></p>                                                                                 | Single-stranded, negative-sense, enveloped RNA virus | Upper and lower respiratory tract disease; exacerbation of underlying conditions <sup>78</sup>                                                                | HPIV-1: Seasonal peaks in autumn every other year <sup>80,81</sup>                                                                                                                             | Transmission primarily through respiratory droplets and less likely aerosolized particles; possible self-inoculation through touching of contaminated surfaces <sup>78</sup>                                                                       | <ul style="list-style-type: none"> <li>•Along with other enveloped viruses, human parainfluenza virus circulation decreased at the outset of the COVID-19 pandemic and remained low through the end of 2020; this corresponded with reductions in emergency department visits and hospitalizations associated with human parainfluenza virus infection.<sup>9-11,21,76,77</sup></li> </ul> |
|                                            | <p><b>Family:</b> <i>Paramyxoviridae</i><br/> <b>Genus:</b> <i>Orthorubulavirus</i><br/> <b>Species:</b> <i>Human orthorubulavirus 2 (HPIV-2), Human</i></p>                                                                                                 |                                                      | HPIV-2 most commonly associated with less severe upper respiratory tract disease but can also cause lower respiratory tract disease; HPIV-4 can also cause    | HPIV-3: Seasonal peaks in the spring <sup>80,81</sup>                                                                                                                                          |                                                                                                                                                                                                                                                    |                                                                                                                                                                                                                                                                                                                                                                                            |
|                                            |                                                                                                                                                                                                                                                              |                                                      |                                                                                                                                                               | HPIV-2: Inconsistent seasonal peaks occasional occurring in the autumn <sup>79-81</sup>                                                                                                        |                                                                                                                                                                                                                                                    |                                                                                                                                                                                                                                                                                                                                                                                            |

|                                     |                                                                                                                                                         |                                                          |                                                                                                                                              |                                                           |                                                                                 |                                                                                                                                                                                                                                                                            |
|-------------------------------------|---------------------------------------------------------------------------------------------------------------------------------------------------------|----------------------------------------------------------|----------------------------------------------------------------------------------------------------------------------------------------------|-----------------------------------------------------------|---------------------------------------------------------------------------------|----------------------------------------------------------------------------------------------------------------------------------------------------------------------------------------------------------------------------------------------------------------------------|
|                                     | <i>orthorubulavirus 4 (HPIV-4)</i>                                                                                                                      |                                                          | both upper and lower respiratory tract disease but is overall less commonly detected; exacerbation of underlying conditions <sup>78</sup>    | HPIV-4: Autumn-winter seasonality <sup>79-81</sup>        |                                                                                 |                                                                                                                                                                                                                                                                            |
| Human parechovirus <sup>82,83</sup> | <b>Family:</b> <i>Picornaviridae</i><br><b>Genus:</b> <i>Parechovirus</i><br><b>Species:</b> <i>Parechovirus A</i><br><b>Genotype:</b> <i>HPEV 1-19</i> | Single-stranded, positive-sense, non-enveloped RNA virus | Respiratory tract and gastrointestinal disease; central nervous system infection reported; infection leading to myocarditis reported as well | Year-round circulation with summer peaks <sup>83,84</sup> | Transmitted through respiratory secretions, droplets and feces <sup>85-88</sup> | •Few studies have been published on human parechovirus activity during the COVID-19 pandemic and baseline surveillance data are limited; however available data suggest there was decreased detection of human parechovirus in young children early in 2020. <sup>21</sup> |

|                                                 |                                                                                                                                                                                         |                                                             |                                                                                                                                                                                                                                                                                                                                                                                                      |                                                                                                                                                                                          |                                                                                                                                                                                                |                                                                                                                                                                                                                                                                                                                                                                                                                                                                                                                                                                                                                                                                                                                                                                                                                                                                                                                                                                                                                                                                                                                                                                                                                                                                                                                                                                                                                           |
|-------------------------------------------------|-----------------------------------------------------------------------------------------------------------------------------------------------------------------------------------------|-------------------------------------------------------------|------------------------------------------------------------------------------------------------------------------------------------------------------------------------------------------------------------------------------------------------------------------------------------------------------------------------------------------------------------------------------------------------------|------------------------------------------------------------------------------------------------------------------------------------------------------------------------------------------|------------------------------------------------------------------------------------------------------------------------------------------------------------------------------------------------|---------------------------------------------------------------------------------------------------------------------------------------------------------------------------------------------------------------------------------------------------------------------------------------------------------------------------------------------------------------------------------------------------------------------------------------------------------------------------------------------------------------------------------------------------------------------------------------------------------------------------------------------------------------------------------------------------------------------------------------------------------------------------------------------------------------------------------------------------------------------------------------------------------------------------------------------------------------------------------------------------------------------------------------------------------------------------------------------------------------------------------------------------------------------------------------------------------------------------------------------------------------------------------------------------------------------------------------------------------------------------------------------------------------------------|
| <p>Respiratory syncytial virus<sup>89</sup></p> | <p><b>Family:</b> <i>Pneumoviridae</i><br/> <b>Genus:</b> <i>Orthopneumovirus</i><br/> <b>Species:</b> <i>Human orthopneumovirus (RSV)</i><br/> <b>Subtype:</b> <i>RSV-A, RSV-B</i></p> | <p>Single-stranded, negative-sense, enveloped RNA virus</p> | <p>Upper and lower respiratory tract disease; exacerbation of underlying conditions; leading cause of lower respiratory tract disease including bronchiolitis and pneumonia in young children; c primary infectious cause of infant hospitalizations in the US before the COVID-19 pandemic; cause of pneumonia in adults; central nervous system disease has also been reported<sup>90-92</sup></p> | <p>Seasonal peaks in winter often overlapping with influenza virus circulation in temperate climates; seasonal peaks also seen in tropical climates in colder months<sup>93-95</sup></p> | <p>Transmission via respiratory droplets between close contacts; self-inoculation through touching of contaminated surfaces; Contact and fomite transmission also possible<sup>96-98</sup></p> | <ul style="list-style-type: none"> <li>•In 2020, respiratory syncytial virus (RSV) circulation decreased across geographical regions and climate zone in association with stay-at-home orders which reduced non-household social interactions and limited transmission through close contacts in childcare or school-age environments. <sup>99,100</sup></li> <li>•During subsequent seasons, countries reported rapid resurgence of RSV infections with some localities experiencing inter-seasonal RSV circulation with uncharacteristic peaks during times of the year not typical of RSV seasonality.<sup>100,101</sup></li> <li>•RSV-associated emergency department visits and hospitalizations similarly decreased with healthcare burden mirroring community circulation levels as cases returned from 2021 onward.<sup>24,36,77,100-110</sup></li> <li>•RSV-associated diagnoses including acute respiratory illness and bronchiolitis experienced similar changes with decreases early in the COVID-19 pandemic and then a return to equivalent or higher levels as non-pharmaceutical intervention measures were relaxed.<sup>111</sup></li> <li>•RSV genomic diversity may have been affected by the reduction in community circulation with regional shifts in subtype predominance; Reports from Australia showed reductions in RSV-A sublineages and emergence of novel lineages.<sup>111</sup></li> </ul> |
|-------------------------------------------------|-----------------------------------------------------------------------------------------------------------------------------------------------------------------------------------------|-------------------------------------------------------------|------------------------------------------------------------------------------------------------------------------------------------------------------------------------------------------------------------------------------------------------------------------------------------------------------------------------------------------------------------------------------------------------------|------------------------------------------------------------------------------------------------------------------------------------------------------------------------------------------|------------------------------------------------------------------------------------------------------------------------------------------------------------------------------------------------|---------------------------------------------------------------------------------------------------------------------------------------------------------------------------------------------------------------------------------------------------------------------------------------------------------------------------------------------------------------------------------------------------------------------------------------------------------------------------------------------------------------------------------------------------------------------------------------------------------------------------------------------------------------------------------------------------------------------------------------------------------------------------------------------------------------------------------------------------------------------------------------------------------------------------------------------------------------------------------------------------------------------------------------------------------------------------------------------------------------------------------------------------------------------------------------------------------------------------------------------------------------------------------------------------------------------------------------------------------------------------------------------------------------------------|

|                                        |                                                                                                                                                                                                                 |                                                                            |                                                                                                                                                                                        |                                                                                                                                                                                                                                        |                                                                                                                                                                                                                                      |                                                                                                                                                                                                                                                                                                                                                                                                                                                                                                                                                                                                                                                                                                                                                                     |
|----------------------------------------|-----------------------------------------------------------------------------------------------------------------------------------------------------------------------------------------------------------------|----------------------------------------------------------------------------|----------------------------------------------------------------------------------------------------------------------------------------------------------------------------------------|----------------------------------------------------------------------------------------------------------------------------------------------------------------------------------------------------------------------------------------|--------------------------------------------------------------------------------------------------------------------------------------------------------------------------------------------------------------------------------------|---------------------------------------------------------------------------------------------------------------------------------------------------------------------------------------------------------------------------------------------------------------------------------------------------------------------------------------------------------------------------------------------------------------------------------------------------------------------------------------------------------------------------------------------------------------------------------------------------------------------------------------------------------------------------------------------------------------------------------------------------------------------|
| <p>Rhinovirus<sup>82,112,113</sup></p> | <p><b>Family:</b> <i>Picornaviridae</i><br/> <b>Genus:</b> <i>Enterovirus</i><br/> <b>Species:</b> <i>Rhinovirus A</i>,<br/> <i>Rhinovirus B</i>, <i>Rhinovirus C</i><br/> <b>Serotype:</b> ~ 160 serotypes</p> | <p>Single-stranded,<br/> positive-sense, non-<br/> enveloped RNA virus</p> | <p>Upper and lower respiratory tract disease; exacerbation of underlying conditions; causes community acquired pneumonia in young children and elderly adults<sup>91,114-117</sup></p> | <p>Year-round circulation with occasional seasonal peaks in late summer to autumn and spring; regional variation in seasonality has been reported; seasonality also may be dependent on circulating serotype<sup>113,118-122</sup></p> | <p>Transmission via respiratory droplets and aerosols between close contacts; long shedding period; self-inoculation via contaminated surfaces, person-to-person contact and fomite transmission also possible<sup>123-126</sup></p> | <ul style="list-style-type: none"> <li>•Most molecular tests are unable to differentiate between rhinoviruses and enteroviruses given their genetic relatedness; genomic sequencing is frequently required to differentiate these viral species</li> <li>•Decreases in rhinovirus and respiratory enterovirus activity coincided with the near-simultaneous implementation of COVID-19 community mitigation measures, but early relaxing of these policies was associated with a rebound of activity returning to pre-COVID-19 pandemic levels. <sup>22,24,36,44,127,128</sup></li> <li>•One genomic study of rhinovirus activity in South Korea showed similar predominance of rhinovirus species before and during the COVID-19 pandemic.<sup>22</sup></li> </ul> |
|----------------------------------------|-----------------------------------------------------------------------------------------------------------------------------------------------------------------------------------------------------------------|----------------------------------------------------------------------------|----------------------------------------------------------------------------------------------------------------------------------------------------------------------------------------|----------------------------------------------------------------------------------------------------------------------------------------------------------------------------------------------------------------------------------------|--------------------------------------------------------------------------------------------------------------------------------------------------------------------------------------------------------------------------------------|---------------------------------------------------------------------------------------------------------------------------------------------------------------------------------------------------------------------------------------------------------------------------------------------------------------------------------------------------------------------------------------------------------------------------------------------------------------------------------------------------------------------------------------------------------------------------------------------------------------------------------------------------------------------------------------------------------------------------------------------------------------------|



## Supplementary References

- 1 Lynch, J. P., 3rd & Kajon, A. E. Adenovirus: Epidemiology, Global Spread of Novel Serotypes, and Advances in Treatment and Prevention. *Semin Respir Crit Care Med* **37**, 586-602 (2016). <https://doi.org/10.1055/s-0036-1584923>
- 2 Lynch, J. P., 3rd, Fishbein, M. & Echavarría, M. Adenovirus. *Semin Respir Crit Care Med* **32**, 494-511 (2011). <https://doi.org/10.1055/s-0031-1283287>
- 3 Crenshaw, B. J., Jones, L. B., Bell, C. R., Kumar, S. & Matthews, Q. L. Perspective on Adenoviruses: Epidemiology, Pathogenicity, and Gene Therapy. *Biomedicines* **7** (2019). <https://doi.org/10.3390/biomedicines7030061>
- 4 Heim, A., Ebnet, C., Harste, G. & Pring-Akerblom, P. Rapid and quantitative detection of human adenovirus DNA by real-time PCR. *J Med Virol* **70**, 228-239 (2003). <https://doi.org/10.1002/jmv.10382>
- 5 Biggs, H. M. *et al.* Adenovirus-Associated Influenza-Like Illness among College Students, Pennsylvania, USA. *Emerg Infect Dis* **24**, 2117-2119 (2018). <https://doi.org/10.3201/eid2411.180488>
- 6 Killerby, M. E. *et al.* Respiratory Illness Associated With Emergent Human Adenovirus Genome Type 7d, New Jersey, 2016-2017. *Open Forum Infect Dis* **6**, ofz017 (2019). <https://doi.org/10.1093/ofid/ofz017>
- 7 Vento, T. J. *et al.* Pneumonia in military trainees: a comparison study based on adenovirus serotype 14 infection. *J Infect Dis* **203**, 1388-1395 (2011). <https://doi.org/10.1093/infdis/jir040>
- 8 Brosch, L. *et al.* Adenovirus serotype 14 pneumonia at a basic military training site in the United States, spring 2007: a case series. *Mil Med* **174**, 1295-1299 (2009). <https://doi.org/10.7205/milmed-d-03-0208>
- 9 El-Heneidy, A. *et al.* Respiratory virus detection during the COVID-19 pandemic in Queensland, Australia. *Aust N Z J Public Health* **46**, 10-15 (2022). <https://doi.org/10.1111/1753-6405.13168>
- 10 *Seattle Flu Study: Pathogens*, <<https://seattleflu.org/pathogens>> (2022).
- 11 Park, K. Y., Seo, S., Han, J. & Park, J. Y. Respiratory virus surveillance in Canada during the COVID-19 pandemic: An epidemiological analysis of the effectiveness of pandemic-related public health measures in reducing seasonal respiratory viruses test positivity. *PLoS One* **16**, e0253451 (2021). <https://doi.org/10.1371/journal.pone.0253451>
- 12 Ippolito, G. *et al.* Disappearance of Seasonal Respiratory Viruses in Children Under Two Years Old During COVID-19 Pandemic: A Monocentric Retrospective Study in Milan, Italy. *Front Pediatr* **9**, 721005 (2021). <https://doi.org/10.3389/fped.2021.721005>
- 13 Guido, M. *et al.* Human bocavirus: Current knowledge and future challenges. *World J Gastroenterol* **22**, 8684-8697 (2016). <https://doi.org/10.3748/wjg.v22.i39.8684>
- 14 Kapoor, A. *et al.* Human bocaviruses are highly diverse, dispersed, recombination prone, and prevalent in enteric infections. *J Infect Dis* **201**, 1633-1643 (2010). <https://doi.org/10.1086/652416>
- 15 Foulongne, V., Rodiere, M. & Segondy, M. Human Bocavirus in children. *Emerg Infect Dis* **12**, 862-863 (2006). <https://doi.org/10.3201/eid1205.051523>
- 16 Anderson, L. J. Human bocavirus: a new viral pathogen. *Clin Infect Dis* **44**, 911-912 (2007). <https://doi.org/10.1086/512438>
- 17 Lau, S. K. *et al.* Clinical and molecular epidemiology of human bocavirus in respiratory and fecal samples from children in Hong Kong. *J Infect Dis* **196**, 986-993 (2007). <https://doi.org/10.1086/521310>
- 18 Vicente, D., Cilla, G., Montes, M., Perez-Yarza, E. G. & Perez-Trallero, E. Human bocavirus, a respiratory and enteric virus. *Emerg Infect Dis* **13**, 636-637 (2007). <https://doi.org/10.3201/eid1304.061501>
- 19 Schildgen, O. Human bocavirus: lessons learned to date. *Pathogens* **2**, 1-12 (2013). <https://doi.org/10.3390/pathogens2010001>
- 20 Ljubin-Sternak, S., Mestrovic, T., Luksic, I., Mijac, M. & Vranes, J. Seasonal Coronaviruses and Other Neglected Respiratory Viruses: A Global Perspective and a Local Snapshot. *Front Public Health* **9**, 691163 (2021). <https://doi.org/10.3389/fpubh.2021.691163>
- 21 Takashita, E. *et al.* Increased risk of rhinovirus infection in children during the coronavirus disease-19 pandemic. *Influenza Other Respir Viruses* **15**, 488-494 (2021). <https://doi.org/10.1111/irv.12854>
- 22 Kim, H. M. *et al.* Impact of coronavirus disease 2019 on respiratory surveillance and explanation of high detection rate of human rhinovirus during the pandemic in the Republic of Korea. *Influenza Other Respir Viruses* **15**, 721-731 (2021). <https://doi.org/10.1111/irv.12894>
- 23 Li, Z. J. *et al.* Broad impacts of COVID-19 pandemic on acute respiratory infections in China: an observational study. *Clin Infect Dis* (2021). <https://doi.org/10.1093/cid/ciab942>
- 24 Park, S., Michelow, I. C. & Choe, Y. J. Shifting Patterns of Respiratory Virus Activity Following Social Distancing Measures for Coronavirus Disease 2019 in South Korea. *J Infect Dis* **224**, 1900-1906 (2021). <https://doi.org/10.1093/infdis/jiab231>
- 25 Coronaviridae Study Group of the International Committee on Taxonomy of, V. The species Severe acute respiratory syndrome-related coronavirus: classifying 2019-nCoV and naming it SARS-CoV-2. *Nat Microbiol* **5**, 536-544 (2020). <https://doi.org/10.1038/s41564-020-0695-z>
- 26 V'Kovski, P., Kratzel, A., Steiner, S., Stalder, H. & Thiel, V. Coronavirus biology and replication: implications for SARS-CoV-2. *Nat Rev Microbiol* **19**, 155-170 (2021). <https://doi.org/10.1038/s41579-020-00468-6>
- 27 Killerby, M. E. *et al.* Human coronavirus circulation in the United States 2014-2017. *J Clin Virol* **101**, 52-56 (2018). <https://doi.org/10.1016/j.jcv.2018.01.019>
- 28 Gerna, G. *et al.* Genetic variability of human coronavirus OC43-, 229E-, and NL63-like strains and their association with lower respiratory tract infections of hospitalized infants and immunocompromised patients. *J Med Virol* **78**, 938-949 (2006). <https://doi.org/10.1002/jmv.20645>
- 29 Gaunt, E. R., Hardie, A., Claas, E. C., Simmonds, P. & Templeton, K. E. Epidemiology and clinical presentations of the four human coronaviruses 229E, HKU1, NL63, and OC43 detected over 3 years using a novel multiplex real-time PCR method. *J Clin Microbiol* **48**, 2940-2947 (2010). <https://doi.org/10.1128/JCM.00636-10>
- 30 Li, Y., Wang, X. & Nair, H. Global Seasonality of Human Seasonal Coronaviruses: A Clue for Postpandemic Circulating Season of Severe Acute Respiratory Syndrome Coronavirus 2? *J Infect Dis* **222**, 1090-1097 (2020). <https://doi.org/10.1093/infdis/jiaa436>
- 31 Monto, A. S. *et al.* Coronavirus Occurrence and Transmission Over 8 Years in the HIVE Cohort of Households in Michigan. *J Infect Dis* **222**, 9-16 (2020). <https://doi.org/10.1093/infdis/jiaa161>

32 Aboubakr, H. A., Sharafeldin, T. A. & Goyal, S. M. Stability of SARS-CoV-2 and other coronaviruses in the environment and on  
common touch surfaces and the influence of climatic conditions: A review. *Transbound Emerg Dis* **68**, 296-312 (2021).  
<https://doi.org/10.1111/tbed.13707>

33 Leung, N. H. L. Transmissibility and transmission of respiratory viruses. *Nat Rev Microbiol* **19**, 528-545 (2021).  
<https://doi.org/10.1038/s41579-021-00535-6>

34 Monto, A. S., Cowling, B. J. & Peiris, J. M. *Coronaviruses*. 199-223 (Springer Science+Business Media, 2014).

35 Zulli, A. *et al.* Occurrence of respiratory viruses on school desks. *Am J Infect Control* **49**, 464-468 (2021).  
<https://doi.org/10.1016/j.ajic.2020.12.006>

36 Song, X. *et al.* Common seasonal respiratory viral infections in children before and during the coronavirus disease 2019 (COVID-19)  
pandemic. *Infect Control Hosp Epidemiol*, 1-5 (2021). <https://doi.org/10.1017/ice.2021.430>

37 *Centers for Disease Control and Prevention. Census Regional Trends for Common Human Coronaviruses*,  
<https://www.cdc.gov/surveillance/nrevss/coronavirus/region.html> (2021).

38 Woo, P. C. *et al.* Comparative analysis of 22 coronavirus HKU1 genomes reveals a novel genotype and evidence of natural  
recombination in coronavirus HKU1. *J Virol* **80**, 7136-7145 (2006). <https://doi.org/10.1128/JVI.00509-06>

39 *Centers for Disease Control and Prevention. Enteroviruses*, <https://www.cdc.gov/dotw/enteroviruses/index.html> (2021).

40 de Graaf, H. *et al.* Severe Enterovirus Infections in Hospitalized Children in the South of England: Clinical Phenotypes and Causative  
Genotypes. *Pediatr Infect Dis J* **35**, 723-727 (2016). <https://doi.org/10.1097/INF.0000000000001093>

41 Pons-Salort, M. *et al.* The seasonality of nonpolio enteroviruses in the United States: Patterns and drivers. *Proc Natl Acad Sci U S A*  
**115**, 3078-3083 (2018). <https://doi.org/10.1073/pnas.1721159115>

42 Messacar, K., Pretty, K., Reno, S. & Dominguez, S. R. Continued biennial circulation of enterovirus D68 in Colorado. *J Clin Virol*  
**113**, 24-26 (2019). <https://doi.org/10.1016/j.jcv.2019.01.008>

43 Chuang, Y. Y. & Huang, Y. C. Enteroviral infection in neonates. *J Microbiol Immunol Infect* **52**, 851-857 (2019).  
<https://doi.org/10.1016/j.jmii.2019.08.018>

44 Olsen, S. J. *et al.* Changes in Influenza and Other Respiratory Virus Activity During the COVID-19 Pandemic - United States, 2020-  
2021. *MMWR Morb Mortal Wkly Rep* **70**, 1013-1019 (2021). <https://doi.org/10.15585/mmwr.mm7029a1>

45 Cooksey, G. L. S. *et al.* Severe Acute Respiratory Syndrome Coronavirus 2 and Respiratory Virus Sentinel Surveillance, California,  
USA, May 10, 2020-June 12, 2021. *Emerg Infect Dis* **28**, 9-19 (2022). <https://doi.org/10.3201/eid2801.211682>

46 Kuitunen, I., Artama, M., Haapanen, M. & Renko, M. Rhinovirus spread in children during the COVID-19 pandemic despite social  
restrictions-A nationwide register study in Finland. *J Med Virol* **93**, 6063-6067 (2021). <https://doi.org/10.1002/jmv.27180>

47 Koutsakos, M., Wheatley, A. K., Laurie, K., Kent, S. J. & Rockman, S. Influenza lineage extinction during the COVID-19 pandemic?  
*Nat Rev Microbiol* **19**, 741-742 (2021). <https://doi.org/10.1038/s41579-021-00642-4>

48 Li, Y. *et al.* Global patterns in monthly activity of influenza virus, respiratory syncytial virus, parainfluenza virus, and  
metapneumovirus: a systematic analysis. *Lancet Glob Health* **7**, e1031-e1045 (2019). [https://doi.org/10.1016/S2214-109X\(19\)30264-5](https://doi.org/10.1016/S2214-109X(19)30264-5)

49 Chow, E. J. *et al.* Acute Cardiovascular Events Associated With Influenza in Hospitalized Adults : A Cross-sectional Study. *Ann*  
*Intern Med* **173**, 605-613 (2020). <https://doi.org/10.7326/M20-1509>

50 Chow, E. J. *et al.* Respiratory and Nonrespiratory Diagnoses Associated With Influenza in Hospitalized Adults. *JAMA Netw Open* **3**,  
e201323 (2020). <https://doi.org/10.1001/jamanetworkopen.2020.1323>

51 Sederdahl, B. K. & Williams, J. V. Epidemiology and Clinical Characteristics of Influenza C Virus. *Viruses* **12** (2020).  
<https://doi.org/10.3390/v12010089>

52 *Centers for Disease Control and Prevention. Fluview: Flu Activity & Surveillance*,  
<https://www.cdc.gov/flu/weekly/fluactivitysurv.htm> (2022).

53 Drori, Y. *et al.* Influenza vaccine effectiveness against laboratory-confirmed influenza in a vaccine-mismatched influenza B-dominant  
season. *Vaccine* **38**, 8387-8395 (2020). <https://doi.org/10.1016/j.vaccine.2020.10.074>

54 Owusu, D. *et al.* Early Season Pediatric Influenza B/Victoria Virus Infections Associated with a Recently Emerged Virus Subclade -  
Louisiana, 2019. *MMWR Morb Mortal Wkly Rep* **69**, 40-43 (2020). <https://doi.org/10.15585/mmwr.mm6902e1>

55 Azziz Baumgartner, E. *et al.* Seasonality, timing, and climate drivers of influenza activity worldwide. *J Infect Dis* **206**, 838-846  
(2012). <https://doi.org/10.1093/infdis/jis467>

56 Cowling, B. J. *et al.* Aerosol transmission is an important mode of influenza A virus spread. *Nat Commun* **4**, 1935 (2013).  
<https://doi.org/10.1038/ncomms2922>

57 Milton, D. K., Fabian, M. P., Cowling, B. J., Grantham, M. L. & McDevitt, J. J. Influenza virus aerosols in human exhaled breath:  
particle size, culturability, and effect of surgical masks. *PLoS Pathog* **9**, e1003205 (2013).  
<https://doi.org/10.1371/journal.ppat.1003205>

58 Ip, D. K. *et al.* Viral Shedding and Transmission Potential of Asymptomatic and Paucisymptomatic Influenza Virus Infections in the  
Community. *Clin Infect Dis* **64**, 736-742 (2017). <https://doi.org/10.1093/cid/ciw841>

59 Laurie, K. L. & Rockman, S. Which influenza viruses will emerge following the SARS-CoV-2 pandemic? *Influenza Other Respir*  
*Viruses* **15**, 573-576 (2021). <https://doi.org/10.1111/irv.12866>

60 Olsen, S. J. *et al.* Decreased Influenza Activity During the COVID-19 Pandemic - United States, Australia, Chile, and South Africa,  
2020. *MMWR Morb Mortal Wkly Rep* **69**, 1305-1309 (2020). <https://doi.org/10.15585/mmwr.mm6937a6>

61 Feng, L. *et al.* Impact of COVID-19 outbreaks and interventions on influenza in China and the United States. *Nat Commun* **12**, 3249  
(2021). <https://doi.org/10.1038/s41467-021-23440-1>

62 Hills, T., Kearns, N., Kearns, C. & Beasley, R. Influenza control during the COVID-19 pandemic. *Lancet* **396**, 1633-1634 (2020).  
[https://doi.org/10.1016/S0140-6736\(20\)32166-8](https://doi.org/10.1016/S0140-6736(20)32166-8)

63 Arellanos-Soto, D. *et al.* Decline in influenza cases in Mexico after the implementation of public health measures for COVID-19. *Sci*  
*Rep* **11**, 10730 (2021). <https://doi.org/10.1038/s41598-021-90329-w>

64 Sullivan, S. G. *et al.* Where has all the influenza gone? The impact of COVID-19 on the circulation of influenza and other respiratory  
viruses, Australia, March to September 2020. *Euro Surveill* **25** (2020). <https://doi.org/10.2807/1560-7917.ES.2020.25.47.2001847>

65 Huang, W. *et al.* Epidemiological and Virological Surveillance of Seasonal Influenza Viruses - China, 2020-2021. *China CDC Wkly* **3**,  
918-922 (2021). <https://doi.org/10.46234/ccdcw2021.224>

66 *World Health Organization. Weekly Epidemiological Record (WER)*, 25 March 2022, Vol. 97, No. 12,  
<https://reliefweb.int/report/world/weekly-epidemiological-record-wer-25-march-2022-vol-97-no-12-pp109-132-enfr> (2022).

67 Nott, R., Fuller, T. L., Brasil, P. & Nielsen-Saines, K. Out-of-Season Influenza during a COVID-19 Void in the State of Rio de  
68 Janeiro, Brazil: Temperature Matters. *Vaccines (Basel)* **10** (2022). <https://doi.org/10.3390/vaccines10050821>  
69 Delahoy, M. J. *et al.* Influenza A(H3N2) Outbreak on a University Campus - Michigan, October-November 2021. *MMWR Morb  
70 Mortal Wkly Rep* **70**, 1712-1714 (2021). <https://doi.org/10.15585/mmwr.mm7049e1>  
71 World Health Organization. Recommended composition of influenza virus vaccines for use in the 2022-2023 northern hemisphere  
72 influenza season. <[https://cdn.who.int/media/docs/default-source/influenza/who-influenza-recommendations/vcm-northern-  
73 hemisphere-recommendation-2022-2023/202202\\_recommendation.pdf?sfvrsn=5c88e006\\_13&download=true](https://cdn.who.int/media/docs/default-source/influenza/who-influenza-recommendations/vcm-northern-hemisphere-recommendation-2022-2023/202202_recommendation.pdf?sfvrsn=5c88e006_13&download=true)> (2022).  
74 Matsuzaki, Y. *et al.* Genetic Lineage and Reassortment of Influenza C Viruses Circulating between 1947 and 2014. *J Virol* **90**, 8251-  
75 8265 (2016). <https://doi.org/10.1128/JVI.00969-16>  
76 Kroll, J. L. & Weinberg, A. Human metapneumovirus. *Semin Respir Crit Care Med* **32**, 447-453 (2011). [https://doi.org/10.1055/s-  
77 0031-1283284](https://doi.org/10.1055/s-0031-1283284)  
78 Yi, L. *et al.* Epidemiology, evolution and transmission of human metapneumovirus in Guangzhou China, 2013-2017. *Sci Rep* **9**, 14022  
79 (2019). <https://doi.org/10.1038/s41598-019-50340-8>  
80 Soto, J. A. *et al.* Human Metapneumovirus: Mechanisms and Molecular Targets Used by the Virus to Avoid the Immune System.  
81 *Front Immunol* **9**, 2466 (2018). <https://doi.org/10.3389/fimmu.2018.02466>  
82 Aberle, J. H., Aberle, S. W., Redlberger-Fritz, M., Sandhofer, M. J. & Popow-Kraupp, T. Human metapneumovirus subgroup changes  
83 and seasonality during epidemics. *Pediatr Infect Dis J* **29**, 1016-1018 (2010). <https://doi.org/10.1097/INF.0b013e3181e3331a>  
84 Aberle, S. W., Aberle, J. H., Sandhofer, M. J., Pracher, E. & Popow-Kraupp, T. Biennial spring activity of human metapneumovirus in  
85 Austria. *Pediatr Infect Dis J* **27**, 1065-1068 (2008). <https://doi.org/10.1097/INF.0b013e31817ef4fd>  
86 Zhang, K. *et al.* Rapid disappearance of influenza following the implementation of COVID-19 mitigation measures in Hamilton,  
87 Ontario. *Can Commun Dis Rep* **47**, 202-209 (2021). <https://doi.org/10.14745/ccdr.v47i04a04>  
88 Rodgers, L. *et al.* Changes in Seasonal Respiratory Illnesses in the United States During the Coronavirus Disease 2019 (COVID-19)  
89 Pandemic. *Clin Infect Dis* **73**, S110-S117 (2021). <https://doi.org/10.1093/cid/ciab311>  
90 Henrickson, K. J. Parainfluenza viruses. *Clin Microbiol Rev* **16**, 242-264 (2003). <https://doi.org/10.1128/CMR.16.2.242-264.2003>  
91 Chellapuri, A. *et al.* Human parainfluenza 2 & 4: Clinical and genetic epidemiology in the UK, 2013-2017, reveals distinct disease  
92 features and co-circulating genomic subtypes. *Influenza Other Respir Viruses* (2022). <https://doi.org/10.1111/irv.13012>  
93 Greiff, D. R. L., Patterson-Robert, A., Blyth, C. C., Glass, K. & Moore, H. C. Epidemiology and seasonality of human parainfluenza  
94 serotypes 1-3 in Australian children. *Influenza Other Respir Viruses* **15**, 661-669 (2021). <https://doi.org/10.1111/irv.12838>  
95 Centers for Disease Control and Prevention. HPIV Seasons, <[https://www.cdc.gov/parainfluenza/seasons.html#:~:text=HPIV%2D3%20infections%20usually%20occur.%20are%20not%20in%20in%20season.>](https://www.cdc.gov/parainfluenza/seasons.html#:~:text=HPIV%2D3%20infections%20usually%20occur.%20are%20not%20in%20season.>)  
96 (2019).>  
97 Chieochansin, T., Puenpa, J. & Poovorawan, Y. Phylogenetic molecular evolution and recombination analysis of complete genome of  
98 human parechovirus in Thailand. *Sci Rep* **11**, 8572 (2021). <https://doi.org/10.1038/s41598-021-88124-8>  
99 Kabuga, A. I., Nejati, A., Soheili, P. & Shahmahmoodi, S. Human parechovirus are emerging pathogens with broad spectrum of  
100 clinical syndromes in adults. *J Med Virol* (2020). <https://doi.org/10.1002/jmv.26395>  
101 Fischer, T. K., Midgley, S., Dalgaard, C. & Nielsen, A. Y. Human parechovirus infection, Denmark. *Emerg Infect Dis* **20**, 83-87  
102 (2014). <https://doi.org/10.3201/eid2001.130569>  
103 Izumita, R. *et al.* Intrafamilial Transmission of Parechovirus A and Enteroviruses in Neonates and Young Infants. *J Pediatric Infect  
104 Dis Soc* **8**, 501-506 (2019). <https://doi.org/10.1093/jpids/piv079>  
105 Karelehto, E. *et al.* Polarized Entry of Human Parechoviruses in the Airway Epithelium. *Front Cell Infect Microbiol* **8**, 294 (2018).  
106 <https://doi.org/10.3389/fcimb.2018.00294>  
107 Aizawa, Y., Yamanaka, T., Watanabe, K., Oishi, T. & Saitoh, A. Asymptomatic children might transmit human parechovirus type 3 to  
108 neonates and young infants. *J Clin Virol* **70**, 105-108 (2015). <https://doi.org/10.1016/j.jcv.2015.07.300>  
109 Wildenbeest, J. G. *et al.* Clinical relevance of positive human parechovirus type 1 and 3 PCR in stool samples. *Clin Microbiol Infect*  
110 **20**, 0640-647 (2014). <https://doi.org/10.1111/1469-0691.12542>  
111 Borchers, A. T., Chang, C., Gershwin, M. E. & Gershwin, L. J. Respiratory syncytial virus--a comprehensive review. *Clin Rev Allergy  
112 Immunol* **45**, 331-379 (2013). <https://doi.org/10.1007/s12016-013-8368-9>  
113 Stockman, L. J., Curns, A. T., Anderson, L. J. & Fischer-Langley, G. Respiratory syncytial virus-associated hospitalizations among  
114 infants and young children in the United States, 1997-2006. *Pediatr Infect Dis J* **31**, 5-9 (2012).  
115 <https://doi.org/10.1097/INF.0b013e31822e68e6>  
116 Jain, S. *et al.* Community-acquired pneumonia requiring hospitalization among U.S. children. *N Engl J Med* **372**, 835-845 (2015).  
117 <https://doi.org/10.1056/NEJMoa1405870>  
118 Leader, S. & Kohlase, K. Respiratory syncytial virus-coded pediatric hospitalizations, 1997 to 1999. *Pediatr Infect Dis J* **21**, 629-632  
119 (2002). <https://doi.org/10.1097/00006454-200207000-00005>  
120 Yu, J. *et al.* Respiratory Syncytial Virus Seasonality, Beijing, China, 2007-2015. *Emerg Infect Dis* **25**, 1127-1135 (2019).  
121 <https://doi.org/10.3201/eid2506.180532>  
122 Staadegaard, L. *et al.* Defining the seasonality of respiratory syncytial virus around the world: National and subnational surveillance  
123 data from 12 countries. *Influenza Other Respir Viruses* **15**, 732-741 (2021). <https://doi.org/10.1111/irv.12885>  
124 Jackson, M. L. *et al.* Epidemiology of Respiratory Syncytial Virus Across Five Influenza Seasons Among Adults and Children One  
125 Year of Age and Older-Washington State, 2011/2012-2015/2016. *J Infect Dis* **223**, 147-156 (2021).  
126 <https://doi.org/10.1093/infdis/jiaa331>  
127 French, C. E. *et al.* Risk of nosocomial respiratory syncytial virus infection and effectiveness of control measures to prevent  
128 transmission events: a systematic review. *Influenza Other Respir Viruses* **10**, 268-290 (2016). <https://doi.org/10.1111/irv.12379>  
129 Hall, C. B., Douglas, R. G., Jr. & Geiman, J. M. Possible transmission by fomites of respiratory syncytial virus. *J Infect Dis* **141**, 98-  
130 102 (1980). <https://doi.org/10.1093/infdis/141.1.98>  
131 Hall, C. B. Respiratory syncytial virus: its transmission in the hospital environment. *Yale J Biol Med* **55**, 219-223 (1982).  
132 Yeoh, D. K. *et al.* Impact of Coronavirus Disease 2019 Public Health Measures on Detections of Influenza and Respiratory Syncytial  
133 Virus in Children During the 2020 Australian Winter. *Clin Infect Dis* **72**, 2199-2202 (2021). <https://doi.org/10.1093/cid/ciaa1475>

100 Foley, D. A. *et al.* The Interseasonal Resurgence of Respiratory Syncytial Virus in Australian Children Following the Reduction of  
 Coronavirus Disease 2019-Related Public Health Measures. *Clin Infect Dis* **73**, e2829-e2830 (2021).  
<https://doi.org/10.1093/cid/ciaa1906>

101 Ferrero, F., Ossorio, M. F. & Rial, M. J. The return of RSV during the COVID-19 pandemic. *Pediatric pulmonology* **57**, 770-771  
 (2022). <https://doi.org/10.1002/ppul.25802>

102 Kuitunen, I. *et al.* Effect of Social Distancing Due to the COVID-19 Pandemic on the Incidence of Viral Respiratory Tract Infections  
 in Children in Finland During Early 2020. *Pediatr Infect Dis J* **39**, e423-e427 (2020). <https://doi.org/10.1097/INF.0000000000002845>

103 Stamm, P. *et al.* Influenza and RSV incidence during COVID-19 pandemic-an observational study from in-hospital point-of-care  
 testing. *Med Microbiol Immunol* **210**, 277-282 (2021). <https://doi.org/10.1007/s00430-021-00720-7>

104 Nolen, L. D. *et al.* Impact of Social Distancing and Travel Restrictions on Non-Coronavirus Disease 2019 (Non-COVID-19)  
 Respiratory Hospital Admissions in Young Children in Rural Alaska. *Clin Infect Dis* **72**, 2196-2198 (2021).  
<https://doi.org/10.1093/cid/ciaa1328>

105 Stera, G. *et al.* Impact of SARS-CoV-2 Pandemic on Bronchiolitis Hospitalizations: The Experience of an Italian Tertiary Center.  
*Children (Basel)* **8** (2021). <https://doi.org/10.3390/children8070556>

106 Bermudez Barrezueta, L. *et al.* Variation in the seasonality of the respiratory syncytial virus during the COVID-19 pandemic.  
*Infection* (2022). <https://doi.org/10.1007/s15010-022-01794-y>

107 Torres-Fernandez, D., Casellas, A., Mellado, M. J., Calvo, C. & Bassat, Q. Acute bronchiolitis and respiratory syncytial virus seasonal  
 transmission during the COVID-19 pandemic in Spain: A national perspective from the pediatric Spanish Society (AEP). *J Clin Virol*  
**145**, 105027 (2021). <https://doi.org/10.1016/j.jcv.2021.105027>

108 Tempia, S. *et al.* Decline of influenza and respiratory syncytial virus detection in facility-based surveillance during the COVID-19  
 pandemic, South Africa, January to October 2020. *Euro Surveill* **26** (2021). <https://doi.org/10.2807/1560-7917.ES.2021.26.29.2001600>

109 Centers for Disease Control and Prevention. Respiratory Syncytial Virus (RSV) Hospitalization Surveillance Network (RSV-NET),  
 <<https://www.cdc.gov/rsv/research/rsv-net.html>> (2021).

110 Olsen, S. J. *et al.* Changes in influenza and other respiratory virus activity during the COVID-19 pandemic-United States, 2020-2021.  
*Am J Transplant* **21**, 3481-3486 (2021). <https://doi.org/10.1111/ajt.16049>

111 Eden, J. S. *et al.* Off-season RSV epidemics in Australia after easing of COVID-19 restrictions. *Nat Commun* **13**, 2884 (2022).  
<https://doi.org/10.1038/s41467-022-30485-3>

112 Kim, J. H., Jang, J. Y. & Jang, Y. J. Human rhinovirus serotypes induces different immune responses. *Virol J* **18**, 232 (2021).  
<https://doi.org/10.1186/s12985-021-01701-1>

113 Falsey, A. R. & Branche, A. R. in *International Encyclopedia of Public Health (Second Edition)* (ed Stella R. Quah) 363-369  
 (Academic Press, 2017).

114 Jain, S. *et al.* Community-Acquired Pneumonia Requiring Hospitalization among U.S. Adults. *N Engl J Med* **373**, 415-427 (2015).  
<https://doi.org/10.1056/NEJMoal500245>

115 Zlateva, K. T. *et al.* Prolonged shedding of rhinovirus and re-infection in adults with respiratory tract illness. *Eur Respir J* **44**, 169-177  
 (2014). <https://doi.org/10.1183/09031936.00172113>

116 Stobart, C. C., Nosek, J. M. & Moore, M. L. Rhinovirus Biology, Antigenic Diversity, and Advancements in the Design of a Human  
 Rhinovirus Vaccine. *Front Microbiol* **8**, 2412 (2017). <https://doi.org/10.3389/fmicb.2017.02412>

117 Sansone, M. *et al.* Rhinovirus infections in western Sweden: a four-year molecular epidemiology study comparing local and globally  
 appearing types. *Eur J Clin Microbiol Infect Dis* **32**, 947-954 (2013). <https://doi.org/10.1007/s10096-013-1832-x>

118 Monto, A. S. The seasonality of rhinovirus infections and its implications for clinical recognition. *Clin Ther* **24**, 1987-1997 (2002).  
[https://doi.org/10.1016/s0149-2918\(02\)80093-5](https://doi.org/10.1016/s0149-2918(02)80093-5)

119 Matthew, J. *et al.* Distribution and seasonality of rhinovirus and other respiratory viruses in a cross-section of asthmatic children in  
 Trinidad, West Indies. *Ital J Pediatr* **35**, 16 (2009). <https://doi.org/10.1186/1824-7288-35-16>

120 Ng, K. T. *et al.* Viral Load and Sequence Analysis Reveal the Symptom Severity, Diversity, and Transmission Clusters of Rhinovirus  
 Infections. *Clin Infect Dis* **67**, 261-268 (2018). <https://doi.org/10.1093/cid/civ063>

121 Taipale, A. *et al.* Human rhino- and enteroviruses in children with respiratory symptoms in Luanda, Angola. *Paediatr Int Child Health*  
**34**, 128-132 (2014). <https://doi.org/10.1179/2046905513Y.0000000101>

122 Lopes, G. P. *et al.* Identification and seasonality of rhinovirus and respiratory syncytial virus in asthmatic children in tropical climate.  
*Biosci Rep* **40** (2020). <https://doi.org/10.1042/BSR20200634>

123 Gwaltney, J. M., Jr. & Hendley, J. O. Transmission of experimental rhinovirus infection by contaminated surfaces. *Am J Epidemiol*  
**116**, 828-833 (1982). <https://doi.org/10.1093/oxfordjournals.aje.a113473>

124 Winther, B., McCue, K., Ashe, K., Rubino, J. R. & Hendley, J. O. Environmental contamination with rhinovirus and transfer to  
 fingers of healthy individuals by daily life activity. *J Med Virol* **79**, 1606-1610 (2007). <https://doi.org/10.1002/jmv.20956>

125 Dick, E. C., Jennings, L. C., Mink, K. A., Wartgow, C. D. & Inhorn, S. L. Aerosol transmission of rhinovirus colds. *J Infect Dis* **156**,  
 442-448 (1987). <https://doi.org/10.1093/infdis/156.3.442>

126 Peltola, V. *et al.* Rhinovirus transmission within families with children: incidence of symptomatic and asymptomatic infections. *J*  
*Infect Dis* **197**, 382-389 (2008). <https://doi.org/10.1086/525542>

127 Poole, S., Brendish, N. J., Tanner, A. R. & Clark, T. W. Physical distancing in schools for SARS-CoV-2 and the resurgence of  
 rhinovirus. *Lancet Respir Med* **8**, e92-e93 (2020). [https://doi.org/10.1016/S2213-2600\(20\)30502-6](https://doi.org/10.1016/S2213-2600(20)30502-6)

128 Zhang, R. X. *et al.* Surges of hospital-based rhinovirus infection during the 2020 coronavirus disease-19 (COVID-19) pandemic in  
 Beijing, China. *World J Pediatr* **17**, 590-596 (2021). <https://doi.org/10.1007/s12519-021-00477-2>
